# Supplementary material
Source: Research Square preprint supplement (doi:10.21203/rs.3.rs-9296884/v1)
Supplement: Supplementary file 1 [file 532ee9326aaa400882999589.docx]

**SUPPLEMENTARY FILE 1**

**Survey Instrument: Help Us Build CareAccess — A Tool Designed for Carers**

Developed for: *Nwokocha LC. Carer Perspectives on Digital Communication and AI-Enhanced Handovers in Domiciliary Care: A Mixed-Methods Needs Assessment. BMC Health Services Research. 2026 [under review].*

Language: English | Mode: Online (Google Forms) | Administered: 2024–2025 | Participants: n = 21

**Preamble (as shown to participants)**

We are building a digital tool designed specifically for carers — one that makes your job easier, not harder. Before we build anything, we want to hear from you. This short survey takes about 5 minutes. Your answers are completely anonymous and will help shape what we create. There are no right or wrong answers. Just tell us what your working life is actually like.

**Q1. What is your current role? (Select all that apply)**

*Multiple choice — select all that apply*

□ Domiciliary carer

□ Live-in carer

□ Residential care worker

□ Team lead / supervisor

□ Nurse

□ Support worker

□ Healthcare assistant

□ Other (please specify): _______________

**Q2. What region or city do you work in?**

*Open text*

*Free text response field*

**Q3. What is your biggest challenge when handing over between shifts? (Multiple choice)**

*Multiple choice — select all that apply*

□ Paper notes get lost or unclear

□ I don't know what the last carer did

□ I don't have time to write detailed notes

□ It's hard to update clients' records on the go

□ Shifting the bulk of information to the next carer

□ Other (please specify): _______________

**Q4. Do you currently use any digital apps or systems at work?**

*Single choice with free text option*

□ Yes

□ No

□ Yes — for medications only

□ Yes — one plan

*If yes, please name the system: _______________*

**Q5. Which features would make your work easier? (Checkboxes — multiple answers allowed)**

*Multi-select checkboxes*

□ Multilingual app interface

□ Voice note handovers

□ Auto-reminders for medications and appointments

□ Mental health support (daily wellbeing check-in)

□ Tips on caring for clients with specific conditions

□ Route guidance (for domiciliary carers)

□ Emergency alert button (lone worker safety)

□ Built-in chat with team leaders / coordinators

□ Other (please specify): _______________

**Q6. How do you prefer to log handovers? (Multiple choice)**

*Multiple choice — select all that apply*

□ Typing

□ Speaking (voice note)

□ Ticking checkboxes

□ Other (please specify): _______________

**Q7. Would you feel safer using an app that keeps client details anonymous (e.g., using just a number)?**

*Single choice*

□ Yes

□ No

**Q8. Would you like to receive regular tips on how to manage your well-being as a carer?**

*Single choice*

□ Yes

□ No

**Q9. What do you wish technology could do to make your job easier?**

*Open-ended paragraph response*

*Free text / long answer response field*

**End of survey. Thank you for your time.**

All responses were anonymous. No personally identifiable information was collected. Data were stored securely and handled in accordance with GDPR requirements. The survey was administered via Google Forms and closed after data saturation was assessed at n = 21 responses.

**Citation:** Nwokocha LC. Carer Perspectives on Digital Communication and AI-Enhanced Handovers in Domiciliary Care: A Mixed-Methods Needs Assessment. BMC Health Services Research. 2026 [under review]. Supplementary File 1.
